# Supplementary material for: Changes of Physicochemical, Bioactive Compounds and Antioxidant Capacity during the Brewing Process of Zhenjiang Aromatic Vinegar
Source: PubMed Central journal article supplement (PMC6864686; doi:10.3390/molecules24213935), 2019-10-31
Supplement: molecules-24-03935-s001.pdf [file molecules-24-03935-s001.pdf]

**Table S1.** Browning index of ZAV samples during the aging process<sup>1,2</sup>.

| <b>Aging process (AP) samples</b> | <b>Browning index (OD 420 nm)</b> |
|-----------------------------------|-----------------------------------|
| 0 year                            | 0.26 ± 0.01 a                     |
| 2 years                           | 0.53 ± 0.01 b                     |
| 4 years                           | 0.67 ± 0.01 c                     |
| 5 years                           | 0.71 ± 0.03 d                     |
| 6 years                           | 0.83 ± 0.03 f                     |
| 7 years                           | 0.74 ± 0.06 e                     |

<sup>1</sup> Data are presented as mean ± S.D. (n = 3). <sup>2</sup> Significant differences are evaluated using the Duncan Multiple comparison Test. Different letters in the column presents statistically significant differences (p < 0.05).
